# Supplementary material
Source: PubMed Central journal article supplement (PMC6373484)

A

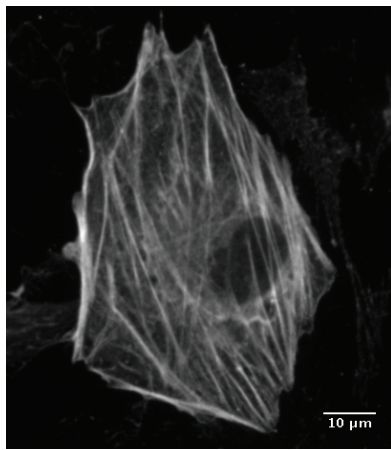

$\alpha$ -actinin

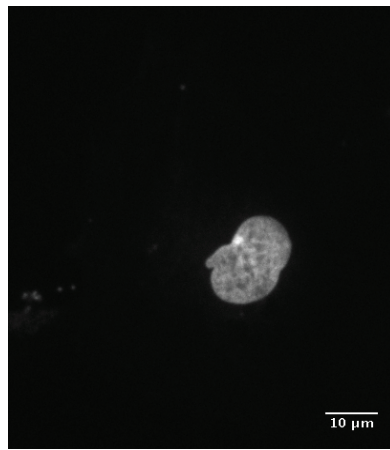

DAPI

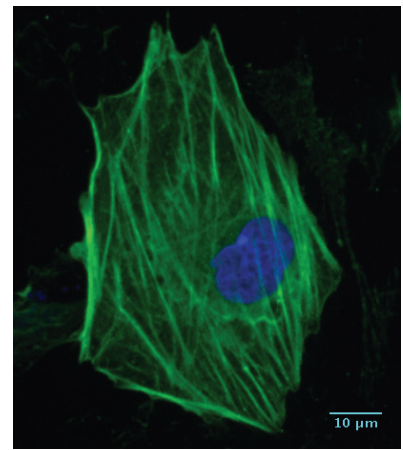

Merge

B

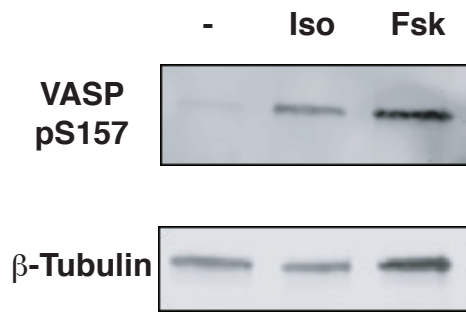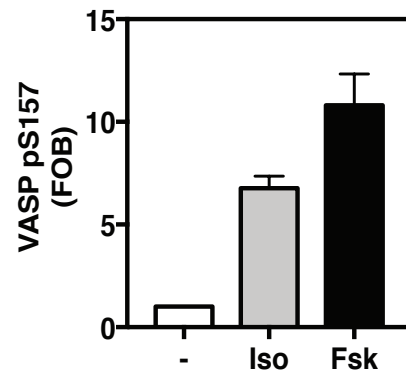

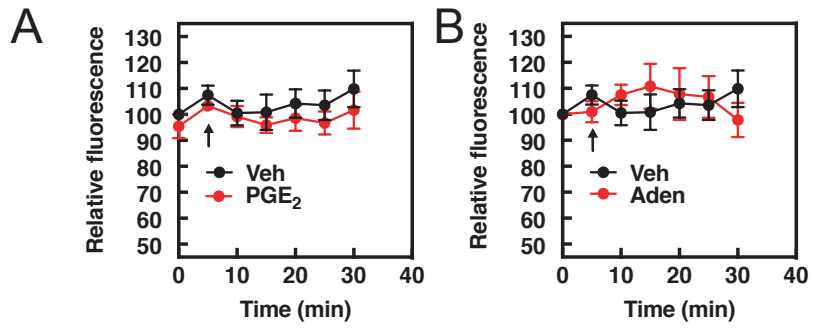

Supplemental Figure 2

A

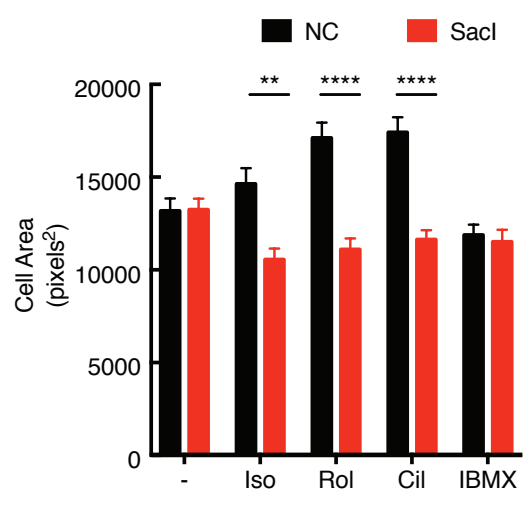

B

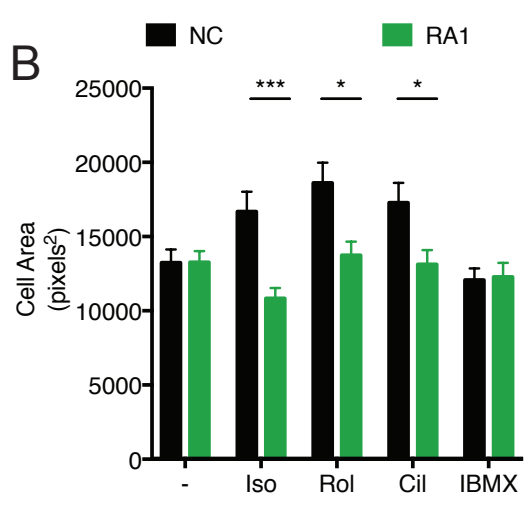

Cell Area  
(pixels<sup>2</sup>)

A

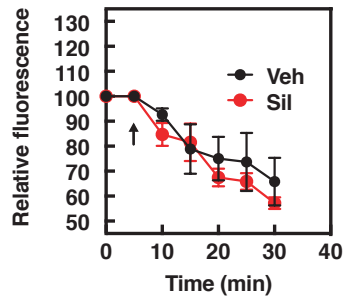

B

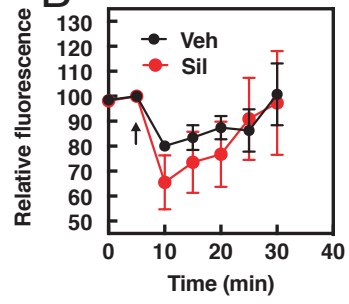

Supplement: NIHMS976624-supplement.pdf [file NIHMS976624-supplement.pdf]
